# Supplementary material
Source: PubMed Central journal article supplement (PMC4702655)

**Text S1** Workflow of the mapping and read counting used on Galaxy server

**Step 1: FASTQ Groomer**

Input FASTQ quality scores type

Sanger & Illumina 1.8+

Use default job resource parameters

**Step 2: FASTQ Quality Trimmer**

Keep reads with zero length

False

Trim ends

5' and 3'

Window size

5

Step Size

1

Maximum number of bases to exclude from the window during aggregation

0

Aggregate action for window

min score

Trim until aggregate score is

$\geq$

Quality Score

30.0

### **Step 3: Cutadapt**

5' (Front) Adapters

Enter custom 5' adapter sequence

GATCGGAAGAGCACACGTCTGAACTCCAGTCAC

Maximum error rate

0.1

Match times

1

Minimum overlap length

3

Match Read Wildcards

False

Do Not Match Adapter Wildcards

False

Output filtering options

Default (no filtering)

Additional output options

Default

Additional modifications to reads

No Read Modifications

### **Step 4: FastQC:Read QC**

Title for the output file - to remind you what the job was for

FastQC

## Step 5: Map with Bowtie for Illumina

Will you select a reference genome from your history or use a built-in index?

Use a built-in index

Select a reference genome

NC\_004350.2

Is this library mate-paired?

Single-end

FASTQ file

Output dataset 'output' from step 3

Bowtie settings to use

Full parameter list

Skip the first n reads (-s)

0

Only align the first n reads (-u)

-1

Trim n bases from high-quality (left) end of each read before alignment (-5)

0

Trim n bases from low-quality (right) end of each read before alignment (-3)

0

Maximum number of mismatches permitted in the seed (-n)

2

Maximum permitted total of quality values at mismatched read positions (-e)

70

Seed length (-l)

28

Whether or not to round to the nearest 10 and saturating at 30 (--nomaqround)

Round to nearest 10

Number of mismatches for SOAP-like alignment policy (-v)

-1

Whether or not to try as hard as possible to find valid alignments when they exist (-y)

Do not try hard

Report up to n valid alignments per read (-k)

1

Whether or not to report all valid alignments per read (-a)

Do not report all valid alignments

Suppress all alignments for a read if more than n reportable alignments exist (-m)

-1

Write all reads with a number of valid alignments exceeding the limit set with the -m option to a file (--max

False

Write all reads that could not be aligned to a file (--un)

False

Whether or not to make Bowtie guarantee that reported singleton alignments are 'best' in terms of stratum

Do not use best

Maximum number of backtracks permitted when aligning a read (--maxbts)

125

Override the offrate of the index to n (-o)

-1

Seed for pseudo-random number generator (--seed)

-1

Suppress the header in the output SAM file

False

Job Resource Parameters

Use default job resource parameters

**Step 6: sort**

BAM File

Output dataset 'output' from step 5

Sort by

Chromosomal coordinates

**Step 7: htseq-count**

Aligned SAM/BAM File

Output dataset 'output1' from step 6

GFF File

select at runtime

Mode

Union

Stranded

Reverse

Minimum alignment quality

10

Feature type

gene

ID Attribute

locus\_tag

Additional BAM Output

False

**Step 8: htseq-count**

Aligned SAM/BAM File

Output dataset 'output1' from step 6

GFF File

select at runtime

Mode

Union

Stranded

Yes

Minimum alignment quality

10

Feature type

gene

ID Attribute

locus\_tag

Additional BAM Output

False

**Table S1** List of genes differentially expressed (fold of change > 1.5) in MMZ1009 when growing in TY supplemented with glucose (Glc), sucrose (Scr) or fructose (Fru).

| Gene ID  | Log <sub>2</sub><br>(Scr/Glc) | Log <sub>2</sub><br>(Fru/Glc) | FDR      | Gene description                                  |
|----------|-------------------------------|-------------------------------|----------|---------------------------------------------------|
| SMU.29   | -1.04                         | -0.81                         | 6.11E-04 | putative SAICAR synthase                          |
| SMU.31   | -1.00                         | -0.72                         | 7.76E-04 | hypothetical protein                              |
| SMU.33   | -0.91                         | -0.82                         | 3.83E-04 | hypothetical protein                              |
| SMU.36   | -0.86                         | -0.86                         | 4.87E-04 | hypothetical protein                              |
| SMU.84   | 0.34                          | 1.31                          | 7.67E-06 | putative tRNA pseudouridine synthase A, TruA      |
| SMU.85   | 0.30                          | 1.26                          | 3.20E-05 | putative phosphomethylpyrimidine kinase, ThiD     |
| SMU.86   | 0.21                          | 1.32                          | 2.70E-04 | hypothetical membrane protein                     |
| SMU.87   | 0.26                          | 1.22                          | 5.24E-05 | hypothetical protein                              |
| SMU.100  | 0.73                          | 1.88                          | 8.31E-04 | PTS system, nigerose-specific enzyme IIB, NigB    |
| SMU.102  | 0.92                          | 1.73                          | 3.18E-06 | PTS system, nigerose-specific enzyme IID, NigD    |
| SMU.104  | 0.76                          | 1.60                          | 7.26E-06 | putative alpha-glucosidase, NigE                  |
| SMU.105  | 0.29                          | 0.89                          | 2.94E-04 | transcriptional repressor NigR                    |
| SMU.124  | 0.04                          | 0.82                          | 2.99E-04 | putative transcriptional regulator (MarR family)  |
| SMU.125  | 0.21                          | 1.10                          | 1.48E-05 | hypothetical protein                              |
| SMU.133c | 0.11                          | 0.75                          | 2.11E-04 | putative MDR permease                             |
| SMU.145  | -0.06                         | 0.68                          | 3.01E-04 | hypothetical protein                              |
| SMU.148  | -1.94                         | -2.60                         | 4.21E-06 | putative alcohol-acetaldehyde dehydrogenase, AdhE |
| SMU.149  | -1.17                         | -1.92                         | 7.92E-04 | putative transposase                              |
| SMU.179  | -1.27                         | -1.52                         | 1.43E-05 | hypothetical protein                              |
| SMU.180  | -1.62                         | -1.80                         | 4.36E-07 | putative oxidoreductase, IlvC                     |
| SMU.237c | 0.25                          | 0.91                          | 2.33E-04 | putative integral membrane protein                |
| SMU.252  | -0.94                         | -0.61                         | 1.75E-04 | hypothetical protein                              |
| SMU.260  | 0.11                          | 0.98                          | 1.89E-04 | hypothetical protein                              |
| SMU.299c | -0.02                         | -0.91                         | 2.91E-04 | putative bacteriocin peptide precursor            |
| SMU.344  | 0.11                          | 0.80                          | 1.27E-04 | hypothetical protein                              |
| SMU.356  | -0.34                         | -0.81                         | 1.58E-04 | purine operon repressor                           |

---

|          |       |       |          |                                                         |
|----------|-------|-------|----------|---------------------------------------------------------|
| SMU.367  | -0.03 | -0.96 | 1.20E-04 | hypothetical protein                                    |
| SMU.396  | 0.75  | 0.78  | 6.07E-04 | putative glycerol uptake facilitator protein, GlpF      |
| SMU.402  | -2.06 | -2.89 | 1.55E-06 | pyruvate formate-lyase, Pfl                             |
| SMU.493  | -0.23 | -1.44 | 1.88E-04 | formate acetyltransferase (pyruvate formate-lyase 2)    |
| SMU.495  | -0.24 | -1.24 | 2.33E-04 | glycerol dehydrogenase, GldA                            |
| SMU.498  | 1.79  | -0.35 | 9.31E-04 | putative late competence protein, ComF                  |
| SMU.500  | -0.62 | -1.23 | 1.13E-06 | putative ribosome-associated protein                    |
| SMU.510c | 0.57  | 1.30  | 6.40E-05 | hypothetical protein                                    |
| SMU.542  | -0.45 | -0.65 | 3.83E-04 | putative glucose kinase, Glk                            |
| SMU.564  | -0.39 | -1.03 | 4.87E-04 | hypothetical protein                                    |
| SMU.576  | -0.85 | -0.68 | 1.78E-04 | response regulator LytT                                 |
| SMU.577  | -0.57 | -0.55 | 7.28E-04 | histidine kinase LytS                                   |
| SMU.600c | 0.92  | 1.03  | 1.12E-04 | hypothetical protein                                    |
| SMU.602  | 1.14  | 0.68  | 1.58E-04 | putative sodium-dependent transporter                   |
| SMU.609  | 0.06  | 1.18  | 8.68E-05 | putative 40K cell wall protein precursor                |
| SMU.610  | 0.25  | 0.93  | 5.13E-04 | cell surface antigen, SpaP                              |
| SMU.625  | 2.33  | 0.95  | 1.78E-04 | putative competence protein, ComEA                      |
| SMU.626  | 2.53  | 0.46  | 3.90E-04 | putative competence protein, ComEC                      |
| SMU.632  | 0.09  | 0.96  | 3.15E-05 | MarR-type transcriptional regulator                     |
| SMU.633  | 0.15  | 1.92  | 1.27E-07 | putative thioesterase                                   |
| SMU.676  | 0.33  | 0.74  | 3.21E-04 | NADP-dependent glyceraldehyde-3-phosphate dehydrogenase |
| SMU.768c | 0.72  | -0.03 | 4.60E-04 | hypothetical protein                                    |
| SMU.848  | 0.08  | 0.72  | 6.62E-05 | hypothetical protein                                    |
| SMU.865  | -0.18 | -0.76 | 6.52E-04 | 30S ribosomal protein S16                               |
| SMU.870  | 1.93  | 1.89  | 2.96E-08 | transcription regulator for fructose metabolism, FruR   |
| SMU.871  | 2.02  | 1.97  | 6.93E-09 | fructose-1-phosphate kinase, FruK                       |
| SMU.872  | 1.90  | 1.92  | 5.15E-08 | PTS system, fructose-specific enzyme IIABC, FruI        |
| SMU.877  | -1.17 | -1.64 | 2.67E-07 | alpha-galactosidase, AgaL                               |
| SMU.878  | -1.22 | -1.77 | 1.37E-06 | multiple sugar-binding ABC transporter, MsmE            |
| SMU.879  | -1.27 | -1.90 | 3.71E-06 | multiple sugar-binding ABC transporter, MsmF            |

---



---

|           |       |       |          |                                                             |
|-----------|-------|-------|----------|-------------------------------------------------------------|
| SMU.880   | -1.30 | -1.84 | 9.72E-06 | multiple sugar-binding ABC transporter, MsmG                |
| SMU.881   | -1.29 | -1.68 | 3.11E-07 | sucrose phosphorylase, GtfA                                 |
| SMU.882   | -1.15 | -1.60 | 1.43E-05 | multiple sugar-binding ABC transporter, MsmK                |
| SMU.883   | -1.10 | -1.34 | 6.13E-07 | dextran glucosidase, DexB                                   |
| SMU.886   | -0.25 | 0.78  | 2.34E-04 | galactokinase, GalK                                         |
| SMU.913   | 0.97  | 1.38  | 3.20E-05 | putative NADP-specific glutamate dehydrogenase              |
| SMU.921   | 0.07  | 1.05  | 7.92E-04 | Transcriptional regulator MarR-type, RcrR                   |
| SMU.922   | 0.16  | 0.67  | 6.23E-04 | ABC transporter, RcrP                                       |
| SMU.923   | 0.10  | 0.66  | 4.33E-04 | ABC transporter, RcrQ                                       |
| SMU.925   | -0.07 | 1.03  | 5.13E-04 | hypothetical protein                                        |
| SMU.926   | -0.06 | 0.81  | 1.96E-05 | (p)ppGpp synthase, RelP                                     |
| SMU.927   | -0.05 | 0.78  | 1.91E-05 | response regulator, RelR                                    |
| SMU.928   | -0.06 | 0.65  | 5.15E-04 | histidine kinase, RelS                                      |
| SMU.935   | 0.58  | -2.30 | 6.13E-04 | putative amino acid ABC transporter                         |
| SMU.940c  | -0.55 | -3.33 | 1.65E-08 | putative hemolysin III                                      |
| SMU.941c  | -0.45 | -3.36 | 6.91E-08 | hypothetical protein                                        |
| SMU.954   | 0.14  | 1.73  | 2.37E-05 | putative pyridoxal kinase                                   |
| SMU.955   | 0.34  | 1.50  | 7.92E-04 | hypothetical membrane protein                               |
| SMU.992   | -0.18 | -0.73 | 7.36E-04 | hypothetical protein                                        |
| SMU.997   | -0.07 | 1.18  | 2.26E-04 | putative inorganic ion ABC transporter                      |
| SMU.998   | -0.07 | 0.95  | 1.74E-04 | putative ABC transporter                                    |
| SMU.1022  | -0.84 | -0.37 | 4.05E-04 | hypothetical protein, CitG2                                 |
| SMU.1023  | -0.71 | -0.35 | 2.71E-04 | pyruvate carboxylase, PycB                                  |
| SMU.1048  | 0.03  | 0.77  | 7.19E-04 | conserved hypothetical protein                              |
| SMU.1077  | -1.10 | -1.30 | 8.26E-06 | phosphoglucomutase, Pgm                                     |
| SMU.1078c | 0.27  | 0.84  | 1.78E-04 | multidrug ABC transporter, ATP-binding and permease protein |
| SMU.1083c | 0.21  | 0.61  | 6.46E-04 | conserved hypothetical protein                              |
| SMU.1088  | -0.76 | -0.56 | 6.05E-05 | putative thiamine biosynthesis lipoprotein, ApbE            |
| SMU.1089  | -0.65 | -0.23 | 2.48E-04 | conserved hypothetical protein                              |
| SMU.1090  | -0.76 | -0.65 | 1.43E-04 | conserved hypothetical protein                              |

---

---

|           |       |       |          |                                                |
|-----------|-------|-------|----------|------------------------------------------------|
| SMU.1091  | -0.18 | -0.83 | 1.48E-04 | possible cell wall protein, WapE               |
| SMU.1095  | 0.13  | 0.59  | 1.20E-04 | putative choline ABC transporter               |
| SMU.1096  | 0.13  | 0.64  | 2.55E-04 | putative ABC transporter                       |
| SMU.1175  | 1.68  | 2.35  | 7.67E-06 | putative sodium/amino acid (alanine) symporter |
| SMU.1243  | 0.08  | 0.75  | 9.62E-04 | putative low temperature requirement protein   |
| SMU.1326  | 0.14  | 0.58  | 6.91E-04 | putative peptide chain release factor (RF-2)   |
| SMU.1339  | 0.05  | -1.48 | 5.19E-04 | bacitracin synthetase, BacD                    |
| SMU.1340  | 0.06  | -1.64 | 4.13E-04 | putative surfactin synthetase, BacA2           |
| SMU.1341c | 0.03  | -1.49 | 1.58E-04 | putative gramicidin S synthetase               |
| SMU.1342  | -0.01 | -1.55 | 2.18E-04 | putative bacitracin synthetase 1; BacA1        |
| SMU.1343c | 0.04  | -1.43 | 3.97E-05 | putative polyketide synthase                   |
| SMU.1347c | -0.05 | -0.94 | 8.79E-04 | possible permease                              |
| SMU.1348c | -0.04 | -0.87 | 2.61E-05 | putative ABC transporter                       |
| SMU.1365c | -0.04 | -0.94 | 8.48E-04 | possible permease                              |
| SMU.1366c | 0.00  | -0.82 | 2.09E-05 | putative ABC transporter                       |
| SMU.1389  | -0.51 | -0.70 | 6.69E-05 | Phosphoenolpyruvate carboxykinase, PckA        |
| SMU.1398  | -0.65 | -1.13 | 1.20E-04 | transcriptional regulator, IrvR                |
| SMU.1410  | -1.53 | -2.49 | 2.11E-04 | putative reductase                             |
| SMU.1411  | -1.55 | -2.36 | 1.84E-05 | hypothetical protein                           |
| SMU.1419  | -0.18 | 0.64  | 1.15E-04 | putative transcriptional regulator             |
| SMU.1535  | -0.97 | -1.15 | 1.91E-06 | glycogen phosphorylase, PhsG                   |
| SMU.1536  | -1.09 | -1.45 | 6.88E-07 | bacterial glycogen synthase, GlgA              |
| SMU.1537  | -1.20 | -1.48 | 9.79E-06 | putative glycogen biosynthesis protein, GlgD   |
| SMU.1538  | -1.04 | -1.42 | 3.06E-06 | glucose-1-phosphate adenylyltransferase, GlgC  |
| SMU.1539  | -0.92 | -1.20 | 1.30E-05 | 1,4-alpha-glucan branching enzyme, GlgB        |
| SMU.1545c | 0.08  | 0.92  | 2.00E-05 | conserved hypothetical protein                 |
| SMU.1550c | 0.21  | 1.01  | 3.21E-04 | hypothetical membrane protein                  |
| SMU.1551c | 0.22  | 1.00  | 5.06E-05 | putative ABC transporter                       |
| SMU.1552c | 0.23  | 1.10  | 2.33E-04 | hypothetical protein                           |
| SMU.1564  | -0.80 | -1.25 | 9.72E-06 | glycogen phosphorylase, GlgP                   |

---

---

|           |       |       |          |                                                                |
|-----------|-------|-------|----------|----------------------------------------------------------------|
| SMU.1565  | -0.54 | -1.26 | 5.19E-04 | putative 4-alpha-glucanotransferase, MalQ                      |
| SMU.1568  | -0.86 | -1.16 | 2.26E-04 | maltose/maltodextrin ABC transporter, MalX                     |
| SMU.1569  | -0.83 | -1.21 | 3.12E-04 | maltose/maltodextrin ABC transporter, MalF                     |
| SMU.1570  | -0.96 | -1.28 | 1.05E-04 | maltose/maltodextrin ABC transporter, MalG                     |
| SMU.1571  | -0.98 | -1.24 | 3.83E-04 | putative ABC transporter, MsmK-like protein                    |
| SMU.1591  | -0.25 | -0.69 | 2.03E-04 | catabolite control protein A, CcpA                             |
| SMU.1697c | 0.34  | 0.96  | 2.33E-04 | hypothetical protein                                           |
| SMU.1699c | 0.41  | 0.87  | 6.17E-04 | hypothetical protein                                           |
| SMU.1700c | 0.99  | 1.81  | 9.79E-06 | CidB                                                           |
| SMU.1702c | 0.03  | 2.67  | 6.63E-09 | putative phosphatase                                           |
| SMU.1703c | -0.18 | 1.49  | 4.94E-05 | hypothetical membrane protein                                  |
| SMU.1734  | -0.16 | 0.71  | 3.62E-04 | putative acetyl-CoA carboxylase alpha subunit                  |
| SMU.1735  | -0.11 | 0.78  | 1.27E-04 | putative acetyl-CoA carboxylase beta subunit                   |
| SMU.1737  | -0.05 | 0.66  | 8.20E-04 | putative 3-hydroxymyristoyl-(acyl carrier protein) dehydratase |
| SMU.1738  | -0.09 | 0.65  | 1.62E-04 | acetyl-CoA carboxylase biotin carboxyl carrier protein subunit |
| SMU.1739  | -0.07 | 0.76  | 2.19E-04 | putative 3-oxoacyl-(acyl-carrier-protein) synthase             |
| SMU.1740  | -0.05 | 0.80  | 1.12E-04 | putative 3-oxoacyl-acyl-carrier-protein reductase              |
| SMU.1741  | -0.09 | 0.77  | 6.40E-05 | putative malonyl-CoA (acyl-carrier-protein) transacylase       |
| SMU.1742c | 0.05  | 0.62  | 6.11E-04 | putative trans-2-enoyl-ACP reductase                           |
| SMU.1758c | 0.11  | -0.62 | 5.19E-04 | conserved hypothetical protein                                 |
| SMU.1763c | 0.13  | -0.67 | 3.55E-05 | CRISPR-associated protein, Cas5                                |
| SMU.1828  | -0.31 | -0.66 | 3.83E-04 | conserved hypothetical protein                                 |
| SMU.1841  | 3.38  | -0.19 | 1.02E-09 | PTS-system, sucrose-specific enzyme IIABC, ScrA                |
| SMU.1843  | 0.59  | -0.85 | 3.42E-06 | sucrose-6-phosphate hydrolase, ScrB                            |
| SMU.1844  | 0.87  | -0.99 | 9.79E-06 | sucrose operon repressor, ScrR                                 |
| SMU.1853  | 0.14  | 0.65  | 3.83E-04 | conserved hypothetical protein                                 |
| SMU.1927  | -0.88 | -1.19 | 1.20E-04 | putative ABC transporter                                       |
| SMU.1928  | -0.96 | -1.27 | 1.89E-04 | putative ABC transporter, PsaB                                 |
| SMU.1956c | 2.43  | 2.51  | 3.21E-06 | LevX                                                           |
| SMU.1957  | 2.42  | 2.50  | 1.65E-08 | PTS-system, fructose-specific enzyme IID, LevG                 |

---

---

|           |       |       |          |                                                 |
|-----------|-------|-------|----------|-------------------------------------------------|
| SMU.1958c | 2.43  | 2.68  | 6.91E-08 | PTS-system, fructose-specific enzyme IIC, LevF  |
| SMU.1960c | 2.24  | 2.35  | 6.23E-07 | PTS-system, fructose-specific enzyme IIB, LevE  |
| SMU.1961c | 2.50  | 2.47  | 3.34E-07 | PTS-system, fructose-specific enzyme IIA, LevD  |
| SMU.1980c | 1.45  | 0.18  | 5.81E-04 | hypothetical protein                            |
| SMU.1981c | 1.05  | -0.09 | 2.01E-04 | competence protein, ComGF                       |
| SMU.1982c | 1.23  | -0.07 | 5.34E-04 | hypothetical protein                            |
| SMU.1983  | 0.83  | -0.20 | 9.31E-04 | competence protein, ComYD                       |
| SMU.1985  | 1.35  | 0.13  | 1.89E-04 | ABC transporter, ComYB                          |
| SMU.1987  | 1.33  | -0.11 | 2.94E-04 | ABC transporter, late competence protein, ComYA |
| SMU.2027  | -0.13 | -0.80 | 7.19E-04 | putative transcriptional regulator              |
| SMU.2028  | -0.77 | -0.83 | 1.77E-04 | beta-D-fructosyltransferase, Ftf                |
| SMU.2042  | 0.66  | 0.93  | 2.29E-04 | dextranase precursor, DexA                      |
| SMU.2046c | -0.79 | -1.03 | 1.45E-04 | Metal-dependent hydrolase                       |
| SMU.2047  | -0.82 | -1.12 | 9.79E-06 | PTS system, maltose-specific IIABC, PtsG        |
| SMU.2127  | -1.37 | -1.70 | 4.40E-07 | putative succinate semialdehyde dehydrogenase   |
| SMU.2137c | 0.00  | 0.70  | 4.03E-04 | conserved hypothetical protein                  |
| SMU.2139c | 0.10  | 0.72  | 1.85E-04 | 50S ribosomal protein L9                        |
| SMU.2146c | -0.05 | -0.70 | 7.19E-04 | hypothetical protein                            |

---

FDR, false discovery rate; cutoff at 0.001.

**Table S2** List of genes differentially expressed in strain MMZ1196 relative to MMZ1009, when both were cultivated in TY supplemented with glucose.

| Gene      | Log <sub>2</sub><br>(MMZ1196/MMZ1009) | padj      | Description                  | Abranches<br>study* |
|-----------|---------------------------------------|-----------|------------------------------|---------------------|
| SMU.1601  | 7.91                                  | 0.00E+00  | <i>celA</i>                  | 1                   |
| SMU.1596  | 7.00                                  | 0.00E+00  | <i>celD</i>                  | 1                   |
| SMU.1599  | 6.98                                  | 0.00E+00  | <i>celR</i>                  | 1                   |
| SMU.1598  | 6.96                                  | 0.00E+00  | <i>celC</i>                  | 1                   |
| SMU.1600  | 6.70                                  | 1.70E-237 | <i>celB</i>                  | 1                   |
| SMU.1597c | 6.62                                  | 1.13E-98  | <i>celX</i>                  | 1                   |
| SMU.2127  | 1.58                                  | 3.51E-67  | aldehyde dehydrogenase       | 1                   |
| SMU.179   | 1.51                                  | 2.95E-32  |                              | 1                   |
| SMU.1538  | 1.41                                  | 3.18E-43  |                              | 1                   |
| SMU.1539  | 1.39                                  | 1.48E-44  | <i>glgB</i>                  |                     |
| SMU.252   | 1.39                                  | 4.84E-22  | hypothetical                 |                     |
| SMU.1537  | 1.32                                  | 1.28E-36  | <i>glgD</i>                  | 1                   |
| SMU.1536  | 1.30                                  | 1.27E-33  | <i>glgA</i>                  | 1                   |
| SMU.180   | 1.29                                  | 9.31E-45  | <i>ilvC</i>                  | 1                   |
| SMU.1425  | 1.25                                  | 2.72E-22  | <i>clpB</i>                  |                     |
| SMU.1117  | 1.24                                  | 1.52E-05  | <i>naoX</i>                  |                     |
| SMU.148   | 1.19                                  | 9.95E-15  | <i>adhE</i>                  | 1                   |
| SMU.402   | 1.15                                  | 8.37E-22  | <i>pfl</i>                   | 1                   |
| SMU.1535  | 1.03                                  | 2.47E-29  | <i>phsG</i>                  | 1                   |
| SMU.980   | 1.00                                  | 2.62E-07  | <i>bglP</i>                  |                     |
| SMU.1116c | 0.93                                  | 2.59E-05  | hypothetical                 |                     |
| SMU.541   | 0.92                                  | 1.50E-04  | hypothetical                 |                     |
| SMU.1411  | 0.87                                  | 8.16E-04  | fucose permease              | 1                   |
| SMU.1088  | 0.86                                  | 3.97E-17  | <i>apbE</i>                  |                     |
| SMU.577   | 0.84                                  | 1.42E-12  | <i>lytS</i>                  |                     |
| SMU.576   | 0.83                                  | 4.22E-10  | <i>lytT</i>                  |                     |
| SMU.871   | 0.81                                  | 2.41E-12  | <i>fruK</i>                  | 1                   |
| SMU.1089  | 0.81                                  | 1.97E-12  |                              |                     |
| SMU.1077  | 0.77                                  | 9.22E-17  | <i>pgm</i>                   | 1                   |
| SMU.1843  | 0.76                                  | 3.28E-10  | <i>scrB</i>                  |                     |
| SMU.1090  | 0.75                                  | 1.18E-14  |                              |                     |
| SMU.89c   | 0.75                                  | 3.01E-07  | putative nitrite transporter |                     |
| SMU.870   | 0.74                                  | 8.49E-10  | <i>fruR</i>                  | 1                   |
| SMU.1410  | 0.73                                  | 1.21E-02  | putative reductase           |                     |
| SMU.542   | 0.72                                  | 1.33E-13  | putative glucose kinase      |                     |
| SMU.872   | 0.71                                  | 4.28E-12  | <i>fruI</i>                  | 1                   |
| SMU.149   | 0.70                                  | 2.81E-02  |                              | 1                   |

|           |      |          |                             |   |
|-----------|------|----------|-----------------------------|---|
| SMU.1841  | 0.69 | 1.04E-09 | <i>scrA</i>                 |   |
| SMU.543   | 0.67 | 5.95E-10 | <i>pspE</i>                 |   |
| SMU.1568  | 0.66 | 7.97E-07 | <i>malX</i>                 |   |
| SMU.1217c | 0.65 | 4.50E-05 | ABC transporter             |   |
| SMU.545   | 0.62 | 3.31E-02 | hypothetical                |   |
| SMU.1423  | 0.61 | 4.17E-02 | <i>pdhA</i>                 |   |
| SMU.1978  | 0.61 | 3.52E-10 | <i>ackA</i>                 |   |
| SMU.1126  | 0.61 | 5.39E-02 | <i>coaA</i>                 |   |
| SMU.1844  | 0.59 | 1.28E-04 | <i>scrR</i>                 |   |
| SMU.1569  | 0.57 | 2.79E-02 | <i>malF</i>                 |   |
| SMU.1125c | 0.56 | 9.80E-05 | hypothetical                |   |
| SMU.1882c | 0.55 | 1.61E-04 |                             |   |
| SMU.1591  | 0.54 | 1.74E-08 | <i>ccpA</i>                 |   |
| SMU.1692  | 0.54 | 1.29E-04 | <i>pflA</i>                 |   |
| SMU.2028  | 0.54 | 1.69E-07 |                             |   |
| SMU.2038  | 0.52 | 1.48E-02 | <i>treB</i>                 | 1 |
| SMU.2037  | 0.50 | 1.65E-02 | <i>treA</i>                 |   |
| SMU.1590  | 0.50 | 3.35E-05 | <i>amyA</i>                 |   |
| SMU.1043c | 0.49 | 2.32E-06 |                             |   |
| SMU.674   | 0.49 | 5.49E-07 | <i>ptsH</i>                 | 1 |
| SMU.1124  | 0.49 | 1.78E-05 | <i>pdp</i>                  |   |
| SMU.500   | 0.48 | 1.32E-05 | ribosome-associated protein |   |
| SMU.88c   | 0.47 | 5.71E-03 | hypothetical                |   |
| SMU.675   | 0.44 | 1.28E-04 | <i>EI</i>                   | 1 |
| SMU.877   | 0.42 | 2.04E-03 | <i>agaL</i>                 |   |
| SMU.2047  | 0.40 | 1.28E-04 | <i>ptsG</i>                 |   |
| SMU.1021  | 0.39 | 1.05E-02 |                             |   |
| SMU.1398  | 0.37 | 1.76E-02 | <i>irvR</i>                 |   |
| SMU.80    | 0.36 | 5.85E-03 | <i>hrcA</i>                 |   |
| SMU.879   | 0.36 | 2.70E-02 | <i>msmF</i>                 |   |
| SMU.1565  | 0.35 | 1.64E-02 | <i>malQ</i>                 |   |
| SMU.81    | 0.35 | 1.50E-02 | <i>grpE</i>                 |   |
| SMU.1603  | 0.34 | 1.65E-02 | <i>lguL</i>                 | 1 |
| SMU.1062  | 0.33 | 7.78E-03 |                             |   |
| SMU.1602  | 0.33 | 1.76E-02 |                             | 1 |
| SMU.1023  | 0.32 | 4.43E-02 | <i>pycB</i>                 |   |
| SMU.1063  | 0.32 | 1.48E-02 |                             |   |
| SMU.878   | 0.32 | 5.19E-02 | <i>msmE</i>                 |   |
| SMU.1564  | 0.31 | 3.56E-02 | <i>glgP</i>                 |   |
| SMU.1389  | 0.31 | 2.65E-02 | <i>pckA</i>                 |   |
| SMU.1122  | 0.30 | 7.00E-02 | <i>cdd</i>                  |   |
| SMU.1121c | 0.29 | 2.51E-02 | ABC transporter             |   |
| SMU.1954  | 0.27 | 1.65E-02 | <i>groEL</i>                |   |

---

|           |       |           |                                        |   |
|-----------|-------|-----------|----------------------------------------|---|
| SMU.2005  | -0.27 | 5.35E-02  | <i>adK</i>                             |   |
| SMU.2074  | -0.34 | 2.40E-03  | <i>nrdD</i>                            |   |
| SMU.363   | -0.34 | 2.20E-02  |                                        |   |
| SMU.365   | -0.37 | 7.85E-04  |                                        |   |
| SMU.393   | -0.39 | 8.42E-03  |                                        |   |
| SMU.1502c | -0.39 | 1.23E-02  | hypothetical                           |   |
| SMU.299c  | -0.39 | 5.39E-02  | bacteriocin                            |   |
| SMU.233   | -0.41 | 4.06E-04  | <i>ilvC</i>                            |   |
| SMU.232   | -0.41 | 1.08E-03  | <i>ilvH</i>                            |   |
| SMU.231   | -0.42 | 9.98E-05  | <i>ilvB</i>                            |   |
| SMU.2042  | -0.44 | 2.36E-04  | <i>dexA</i>                            | 1 |
| SMU.2072c | -0.47 | 7.18E-02  | hypothetical                           |   |
| SMU.633   | -0.47 | 2.06E-04  | thioesterase                           |   |
| SMU.1073  | -0.53 | 2.29E-02  | <i>fthS</i>                            |   |
| SMU.1700c | -0.54 | 5.58E-02  | <i>cidB</i>                            |   |
| SMU.1961c | -0.57 | 1.05E-02  | <i>levD</i>                            |   |
| SMU.1960c | -0.62 | 1.85E-04  | <i>levE</i>                            |   |
| SMU.1956c | -0.68 | 1.73E-03  | <i>levX</i>                            |   |
| SMU.1957  | -0.69 | 7.39E-10  | <i>levG</i>                            |   |
| SMU.49    | -0.71 | 1.25E-07  |                                        |   |
| SMU.600c  | -0.72 | 4.89E-03  | hypothetical                           |   |
| SMU.1958c | -0.73 | 1.36E-10  | <i>levF</i>                            |   |
| SMU.52    | -0.74 | 1.55E-08  |                                        |   |
| SMU.50    | -0.80 | 1.16E-02  |                                        |   |
| SMU.55    | -0.81 | 4.78E-09  |                                        |   |
| SMU.396   | -0.81 | 5.28E-11  | <i>glpF</i>                            |   |
| SMU.58    | -0.82 | 1.70E-03  |                                        |   |
| SMU.53    | -0.83 | 1.73E-03  |                                        |   |
| SMU.54    | -0.87 | 3.78E-04  |                                        |   |
| SMU.31    | -0.90 | 1.96E-05  |                                        |   |
| SMU.29    | -0.91 | 9.40E-06  |                                        |   |
| SMU.36    | -0.91 | 2.40E-07  |                                        |   |
| SMU.59    | -0.92 | 4.82E-03  |                                        |   |
| SMU.56    | -0.92 | 9.65E-05  |                                        |   |
| SMU.30    | -1.01 | 1.31E-03  |                                        |   |
| SMU.33    | -1.03 | 4.59E-05  |                                        |   |
| SMU.35    | -1.03 | 4.41E-03  |                                        |   |
| SMU.37    | -1.04 | 1.18E-04  |                                        |   |
| SMU.34    | -1.04 | 9.39E-03  |                                        |   |
| SMU.1881c | -1.45 | 8.39E-25  | <i>sunT</i>                            |   |
| SMU.1175  | -1.66 | 7.22E-09  | alanine symporter                      |   |
| SMU.602   | -2.13 | 9.67E-19  | Na <sup>+</sup> -dependent transporter | 1 |
| SMU.1877  | -2.51 | 1.15E-123 | <i>manL</i>                            |   |

---

---

|          |       |           |             |
|----------|-------|-----------|-------------|
| SMU.1878 | -9.21 | 6.20E-277 | <i>manM</i> |
| SMU.1879 | -9.68 | 0.00E+00  | <i>manN</i> |

---

- \* Presence of a number 1 indicates that this ORF was previously identified as being regulated by glucose-PTS in a similar study (*J Bacteriol* 188: 3748-3756).



**Table S3** List of genes differentially expressed in strain MMZ1196 growing in TY-sucrose (Scr), in comparison to TY-glucose (Glc).

| Gene      | Log <sub>2</sub> (Scr/Glc) | padj      | 1009GlcvsScr* |
|-----------|----------------------------|-----------|---------------|
| SMU.1175  | 3.45                       | 5.05E-49  | 1             |
| SMU.602   | 3.36                       | 1.08E-188 | 1             |
| SMU.1958c | 3.10                       | 5.59E-49  | 1             |
| SMU.1957  | 3.07                       | 1.85E-61  | 1             |
| SMU.1956c | 3.01                       | 1.88E-65  | 1             |
| SMU.1961c | 2.94                       | 2.18E-20  | 1             |
| SMU.1960c | 2.88                       | 2.57E-27  | 1             |
| SMU.1841  | 2.77                       | 0.00E+00  | 1             |
| SMU.499   | 2.67                       | 9.19E-10  | 1             |
| SMU.626   | 2.60                       | 9.80E-09  | 1             |
| SMU.625   | 2.37                       | 1.42E-08  | 1             |
| SMU.498   | 2.04                       | 1.45E-10  | 1             |
| SMU.1980c | 1.84                       | 1.54E-10  | 1             |
| SMU.600c  | 1.69                       | 5.17E-20  | 1             |
| SMU.396   | 1.68                       | 2.18E-144 | 1             |
| SMU.1700c | 1.60                       | 1.17E-21  | 1             |
| SMU.1981c | 1.55                       | 3.74E-05  | 1             |
| SMU.1987  | 1.44                       | 5.13E-11  | 1             |
| SMU.1982c | 1.38                       | 1.91E-03  | 1             |
| SMU.1985  | 1.36                       | 5.52E-06  | 1             |
| SMU.913   | 1.34                       | 1.55E-82  | 1             |
| SMU.1701c | 1.32                       | 2.46E-07  | 1             |
| SMU.871   | 1.20                       | 2.02E-59  | 1             |
| SMU.872   | 1.19                       | 1.61E-80  | 1             |
| SMU.870   | 1.18                       | 1.92E-51  | 1             |
| SMU.1983  | 1.15                       | 1.59E-04  | 1             |
| SMU.2042  | 1.10                       | 2.13E-63  | 1             |
| SMU.1984  | 1.09                       | 1.50E-03  | 1             |
| SMU.768c  | 1.01                       | 1.10E-06  | 1             |
| SMU.233   | 0.97                       | 2.36E-57  | 1             |
| SMU.231   | 0.96                       | 1.57E-54  | 1             |
| SMU.232   | 0.93                       | 2.01E-38  | 1             |
| SMU.836   | 0.90                       | 3.38E-05  | 1             |
| SMU.365   | 0.90                       | 1.46E-46  | 1             |
| SMU.438c  | 0.86                       | 1.81E-09  |               |
| SMU.1967  | 0.85                       | 1.65E-04  | 1             |
| SMU.644   | 0.84                       | 1.39E-02  |               |

---

|           |       |          |   |
|-----------|-------|----------|---|
| SMU.366   | 0.81  | 4.76E-29 | 1 |
| SMU.05    | 0.75  | 1.15E-02 | 1 |
| SMU.1699c | 0.74  | 9.63E-19 | 1 |
| SMU.633   | 0.72  | 1.70E-17 |   |
| SMU.84    | 0.71  | 1.33E-04 |   |
| SMU.46    | 0.71  | 4.61E-03 | 1 |
| SMU.1862  | 0.71  | 7.82E-02 |   |
| SMU.363   | 0.69  | 8.96E-20 | 1 |
| SMU.47    | 0.68  | 3.28E-03 | 1 |
| SMU.364   | 0.67  | 2.45E-20 | 1 |
| SMU.09    | 0.67  | 2.27E-03 |   |
| SMU.85    | 0.62  | 3.49E-04 |   |
| SMU.916c  | 0.61  | 5.66E-05 |   |
| SMU.1520  | 0.60  | 2.38E-04 | 1 |
| SMU.1109c | 0.57  | 1.17E-13 |   |
| SMU.1521  | 0.57  | 8.36E-05 | 1 |
| SMU.510c  | 0.57  | 5.24E-02 | 1 |
| SMU.954   | 0.56  | 5.76E-02 |   |
| SMU.393   | 0.56  | 4.15E-10 |   |
| SMU.1595  | 0.56  | 1.61E-12 |   |
| SMU.87    | 0.56  | 4.60E-04 |   |
| SMU.873   | 0.55  | 8.52E-02 |   |
| SMU.10    | 0.54  | 1.39E-03 |   |
| SMU.1502c | 0.54  | 1.81E-07 |   |
| SMU.914c  | 0.54  | 2.99E-02 |   |
| SMU.1519  | 0.54  | 5.44E-04 |   |
| SMU.632   | 0.53  | 1.40E-05 |   |
| SMU.915c  | 0.52  | 2.65E-02 |   |
| SMU.394c  | 0.51  | 2.32E-02 |   |
| SMU.102   | 0.51  | 8.09E-02 | 1 |
| SMU.1375c | 0.51  | 5.24E-02 |   |
| SMU.1317c | 0.51  | 7.64E-02 |   |
| SMU.917c  | 0.50  | 5.93E-02 |   |
| SMU.1078c | 0.50  | 7.25E-11 |   |
| SMU.941c  | -0.50 | 6.19E-09 | 1 |
| SMU.1869  | -0.50 | 9.29E-04 | 1 |
| SMU.1954  | -0.51 | 3.69E-11 | 1 |
| SMU.1746c | -0.51 | 5.85E-14 | 1 |
| SMU.1602  | -0.52 | 2.06E-08 |   |
| SMU.1017  | -0.52 | 4.36E-03 |   |
| SMU.2119  | -0.52 | 4.67E-06 |   |
| SMU.618   | -0.52 | 7.01E-05 | 1 |
| SMU.803c  | -0.53 | 1.60E-02 |   |

---

---

|           |       |          |   |
|-----------|-------|----------|---|
| SMU.1714c | -0.54 | 7.61E-09 |   |
| SMU.1895c | -0.55 | 4.37E-02 |   |
| SMU.1422  | -0.57 | 6.38E-02 |   |
| SMU.1349  | -0.58 | 5.65E-04 |   |
| SMU.1603  | -0.58 | 2.07E-09 |   |
| SMU.401c  | -0.58 | 9.25E-02 |   |
| SMU.1402c | -0.61 | 8.17E-03 |   |
| SMU.1019  | -0.62 | 5.32E-02 |   |
| SMU.1071c | -0.63 | 1.40E-05 | 1 |
| SMU.1590  | -0.67 | 2.25E-14 |   |
| SMU.804   | -0.67 | 4.32E-09 |   |
| SMU.1421  | -0.71 | 4.97E-03 |   |
| SMU.1293c | -0.72 | 5.06E-24 | 1 |
| SMU.1124  | -0.74 | 5.17E-22 |   |
| SMU.88c   | -0.78 | 9.17E-09 |   |
| SMU.21    | -0.78 | 6.90E-02 |   |
| SMU.1591  | -0.79 | 7.17E-36 |   |
| SMU.798c  | -0.80 | 7.29E-02 |   |
| SMU.1125c | -0.82 | 6.69E-14 |   |
| SMU.1389  | -0.83 | 1.19E-30 | 1 |
| SMU.1020  | -0.87 | 1.42E-06 | 1 |
| SMU.674   | -0.93 | 7.18E-48 | 1 |
| SMU.132   | -0.93 | 6.83E-05 |   |
| SMU.799c  | -0.95 | 3.10E-03 |   |
| SMU.1043c | -0.96 | 4.42E-44 | 1 |
| SMU.1398  | -0.97 | 5.16E-23 | 1 |
| SMU.2046c | -0.99 | 4.07E-20 | 1 |
| SMU.675   | -1.00 | 6.40E-62 | 1 |
| SMU.1023  | -1.01 | 4.71E-26 | 1 |
| SMU.1022  | -1.02 | 1.12E-05 | 1 |
| SMU.1021  | -1.04 | 1.11E-28 |   |
| SMU.1565  | -1.08 | 5.57E-39 | 1 |
| SMU.1978  | -1.09 | 2.54E-66 | 1 |
| SMU.1425  | -1.10 | 1.39E-03 |   |
| SMU.114   | -1.11 | 5.24E-03 |   |
| SMU.1564  | -1.11 | 2.80E-53 | 1 |
| SMU.130   | -1.11 | 2.16E-05 |   |
| SMU.131   | -1.12 | 1.87E-05 |   |
| SMU.1217c | -1.12 | 9.76E-13 |   |
| SMU.1126  | -1.13 | 5.10E-06 |   |
| SMU.1571  | -1.14 | 8.33E-09 | 1 |
| SMU.2047  | -1.15 | 2.97E-76 | 1 |
| SMU.1692  | -1.15 | 7.74E-11 | 1 |

---

---

|           |       |           |   |
|-----------|-------|-----------|---|
| SMU.500   | -1.15 | 1.05E-59  | 1 |
| SMU.116   | -1.17 | 1.77E-03  |   |
| SMU.129   | -1.23 | 1.39E-03  |   |
| SMU.89c   | -1.24 | 1.83E-19  | 1 |
| SMU.542   | -1.26 | 7.13E-78  | 1 |
| SMU.543   | -1.27 | 1.24E-61  | 1 |
| SMU.981   | -1.28 | 3.67E-03  |   |
| SMU.2028  | -1.34 | 1.89E-78  | 1 |
| SMU.128   | -1.35 | 5.54E-04  |   |
| SMU.883   | -1.35 | 4.36E-59  | 1 |
| SMU.882   | -1.35 | 1.08E-37  | 1 |
| SMU.1927  | -1.35 | 2.06E-09  | 1 |
| SMU.545   | -1.36 | 2.89E-08  |   |
| SMU.1089  | -1.36 | 2.80E-60  | 1 |
| SMU.1570  | -1.37 | 2.51E-07  | 1 |
| SMU.1568  | -1.38 | 2.67E-27  | 1 |
| SMU.127   | -1.38 | 1.18E-03  |   |
| SMU.982   | -1.39 | 1.16E-02  |   |
| SMU.1928  | -1.43 | 1.63E-63  | 1 |
| SMU.1569  | -1.46 | 2.76E-11  | 1 |
| SMU.1090  | -1.46 | 5.62E-102 | 1 |
| SMU.881   | -1.47 | 1.88E-75  | 1 |
| SMU.878   | -1.52 | 5.04E-67  | 1 |
| SMU.1088  | -1.54 | 6.80E-100 | 1 |
| SMU.877   | -1.56 | 1.11E-75  | 1 |
| SMU.577   | -1.58 | 6.11E-71  | 1 |
| SMU.879   | -1.61 | 2.92E-64  | 1 |
| SMU.880   | -1.61 | 9.19E-63  | 1 |
| SMU.1116c | -1.72 | 2.91E-16  |   |
| SMU.541   | -1.73 | 1.68E-12  |   |
| SMU.576   | -1.75 | 3.00E-38  | 1 |
| SMU.980   | -1.79 | 5.18E-18  | 1 |
| SMU.1077  | -1.81 | 4.44E-198 | 1 |
| SMU.1535  | -1.93 | 6.25E-203 | 1 |
| SMU.1410  | -2.10 | 2.47E-15  | 1 |
| SMU.149   | -2.12 | 1.63E-14  | 1 |
| SMU.1539  | -2.20 | 2.17E-198 | 1 |
| SMU.1411  | -2.28 | 1.37E-18  | 1 |
| SMU.252   | -2.31 | 2.20E-45  | 1 |
| SMU.1117  | -2.38 | 9.11E-14  |   |
| SMU.1536  | -2.39 | 1.91E-79  | 1 |
| SMU.1538  | -2.49 | 1.09E-222 | 1 |
| SMU.1537  | -2.49 | 3.15E-213 | 1 |

---

---

|           |       |           |   |
|-----------|-------|-----------|---|
| SMU.179   | -2.80 | 4.94E-90  | 1 |
| SMU.180   | -2.87 | 0.00E+00  | 1 |
| SMU.2127  | -2.98 | 0.00E+00  | 1 |
| SMU.148   | -3.09 | 1.42E-136 | 1 |
| SMU.402   | -3.44 | 0.00E+00  | 1 |
| SMU.1597c | -6.50 | 1.20E-93  |   |
| SMU.1600  | -6.77 | 1.61E-245 |   |
| SMU.1599  | -6.88 | 0.00E+00  |   |
| SMU.1598  | -6.94 | 0.00E+00  |   |
| SMU.1596  | -6.97 | 0.00E+00  |   |
| SMU.1601  | -8.11 | 0.00E+00  |   |

---

\* Presence of a number 1 indicates that this ORF has been identified as differentially expressed in strain MMZ1009, when growing similarly under glucose and sucrose conditions (Table 2). Note: the fold-of-change cutoff here is smaller, therefore more ORFs are retained, than that in Table 2.

**Table S4** Primers used in this study.

| Name            | Sequence                                                           | Purpose           |
|-----------------|--------------------------------------------------------------------|-------------------|
| fruB-5'         | 5'- GGG TAA ACG AAT CAA TGA TGA TCA AT -3'                         | <i>fruBM1stop</i> |
| fruBM1stop-3'   | 5'- CAA ACT AAT TTT TTC TTT AGC TAA AGA<br>CAC CTC TAT CTA TTG -3' | <i>fruBM1stop</i> |
| fruBM1stop-5'   | 5'- CAA TAG ATA GAG GTG TCT TTA GCT AAA<br>GAA AAA ATT AGT TTG -3' | <i>fruBM1stop</i> |
| fruBdelta113-3' | 5'- GGT AGG TAA ATC TTT GAA AAA TTG ATT-3'                         | <i>fruBM1stop</i> |
| gyrA-S          | 5'- CCA AGA ATC TGC TGT CCG -3'                                    | <i>gyrA</i>       |
| gyrA-AS         | 5'- TTG CGA CTA TCT GCT ATG TG -3'                                 | <i>gyrA</i>       |
| SMU.180-S       | 5'- TTT TAG ATG CTC CGG GTG TC -3'                                 | SMU.180           |
| SMU.180-AS      | 5'- GAC TTG AGG TTG CCT GCT TC -3'                                 | SMU.180           |
| SMU.1927-S      | 5'- CGA GGT CCG TGC CAA TAA TA -3'                                 | SMU.1927          |
| SMU.1927-AS     | 5'- TTG AGC AGG GTT GAT TTT CC -3'                                 | SMU.1927          |
| comEA-S         | 5'- CGG TGA GAA GAA AGC TCA GG -3'                                 | <i>comEA</i>      |
| comEA-AS        | 5'- TTT ATC GCC AAT CCC TGA AA -3'                                 | <i>comEA</i>      |
| SMU.1175-S      | 5'- TCA TGG CTG CAG CTT ACA TC -3'                                 | SMU.1175          |
| SMU.1175-AS     | 5'- TTG TTC AAT GGC AGG AAT GA -3'                                 | SMU.1175          |
| dacA-S          | 5'- GTC CCC ATG GAT GCT AGA GA -3'                                 | <i>dacA</i>       |
| dacA-AS         | 5'- CCA ACT TTT TCA GCC AAA GC -3'                                 | <i>dacA</i>       |
| purC-S          | 5'- TGG TTC CAT CAA ATC GGA CT -3'                                 | <i>purC</i>       |
| purC-AS         | 5'- GCA TCC CAA AGA CGA CAG TT -3'                                 | <i>purC</i>       |
| SMU.101-S       | 5'- TTA GGT GTT GCT GGG CTA GG -3'                                 | SMU.101           |
| SMU.101-AS      | 5'- CAA ACC CGA TCC TGT CCT AA -3'                                 | SMU.101           |
| rcrR-S          | 5'-TGT TTT AAC GCC ATT AGG TCA GG -3'                              | <i>rcrR</i>       |
| rcrR-AS         | 5'- TCC GAG CAA CTG ATA AGT CTT CC -3'                             | <i>rcrR</i>       |
| ptsG-S          | 5'- CGG ATT CAG TTG AAA GAG CCA AG -3'                             | <i>ptsG</i>       |
| ptsG-AS         | 5'- GAC GAT AAT ACC GCC GAA CAC C -3'                              | <i>ptsG</i>       |
| levD-S          | 5'- GCC CTT TGA CAA CAG CTT GC -3'                                 | <i>levD</i>       |
| levD-AS         | 5'- CTG CCA TTG GTA AGT TCA TCC C -3'                              | <i>levD</i>       |
| glgD-S          | 5'- GCT ATC GGA TTC CCA GAA ATG G -3'                              | <i>glgD</i>       |
| glgD-AS         | 5'- CAC GAC CGC TTC TGA TAT GAT C -3'                              | <i>glgD</i>       |
| ftf-S           | 5'- AAA TAT GAA GGC GGC TAC AAC G -3'                              | <i>ftf</i>        |
| ftf-AS          | 5'- CTT CAC CAG TCT TAG CAT CCT GAA -3'                            | <i>ftf</i>        |
| pfl-S           | 5'- AAG GAA CTG ACT GGA AAG AC -3'                                 | <i>pfl</i>        |
| pfl-AS          | 5'- CGT GTT TCT TCG TAA TGC G -3'                                  | <i>pfl</i>        |
| scrA-S          | 5'- TGC AGC AAA TAA GGC ACA AG -3'                                 | <i>scrA</i>       |
| scrA-AS         | 5'- ATC CCC TTA CCC ATT GCT TC -3'                                 | <i>scrA</i>       |
| scrB-S          | 5'- TGA TGC ATC GGA AAT TCA AA -3'                                 | <i>scrB</i>       |
| scrB-AS         | 5'- ATA AAC ACG GCC ATC AGG AG -3'                                 | <i>scrB</i>       |
| scrK-S          | 5'- AGC GGG TCC TAG CTT AGA GG -3'                                 | <i>scrK</i>       |

---

|             |                                       |              |
|-------------|---------------------------------------|--------------|
| scrK-AS     | 5'- GGA CAG TCG CTT GAA TAG CC -3'    | <i>scrK</i>  |
| fruR-S      | 5'- GCT GGG ACA ACA ACT GCT CTT C -3' | <i>fruR</i>  |
| fruR-AS     | 5'- GCC AAC TGA CCT ATG CTC GC -3'    | <i>fruR</i>  |
| pgm-S       | 5'- ATT GGC GCT GGA ACT AAT CG -3'    | <i>pgm</i>   |
| pgm-AS      | 5'- TTG AGA GAA ATG ACG GGA ATC G-3'  | <i>pgm</i>   |
| bacD-S      | 5'- TTC TGA AAT GCC GTT GAT GA -3'    | <i>bacD</i>  |
| bacD-AS     | 5'- CGC CGA TAA TTC TTC GAC AT -3'    | <i>bacD</i>  |
| lytS-S      | 5'- AGC TGC GCT TTC CTG ATA AA -3'    | <i>lytS</i>  |
| lytS-AS     | 5'- ATG ACG CAC TGC ATT TTC AA -3'    | <i>lytS</i>  |
| comYA-S     | 5'- GGC ATC GTC CGG ATA TTT TA -3'    | <i>comYA</i> |
| comYA-AS    | 5'- TTG CCC CTG TAA GAC TTG CT -3'    | <i>comYA</i> |
| cidB-S      | 5'- GTT TTG GGG CCA ACT CTT TT -3'    | <i>cidB</i>  |
| cidB-AS     | 5'- AGC CGT TCC AGT ACC AAC AG -3'    | <i>cidB</i>  |
| gtfD-S      | 5'- CAC AGG CAA AAG CTG AAT TAA C -3' | <i>gtfD</i>  |
| gtfD-AS     | 5'- GAA TGG CCG CTA AGT CAA CA -3'    | <i>gtfD</i>  |
| ptsH-S      | 5'- CAT GCA CGC CCA GCT ACT TTG -3'   | <i>ptsH</i>  |
| ptsH-AS     | 5'- CAT CAG CAC CTT GAC CAA CAC C -3' | <i>ptsH</i>  |
| ptsI-S      | 5'- GCA GTA GAT ACC CTT GGT GAA G -3' | <i>ptsI</i>  |
| ptsI-AS     | 5'- TCT GTC ACT TCT TTG AGA GCA C -3' | <i>ptsI</i>  |
| SMU.1349-S  | 5'- TGA CTA AGG GAA CAA GGG AAA A -3' | SMU.1349     |
| SMU.1349-AS | 5'- AGG CTT CCT CAG CAA TTT CA -3'    | SMU.1349     |

---

**FIG S1** Sucrose pulsing leads to release of fructose by *S. mutans*. Strains MMZ952 (*gtfABCD/ftf/fruA*, dark) and MMZ993 (*gtfABCD/ftf/fruA/scrA*, light) were cultivated in TV medium supplemented with 0.5% of galactose into exponential phase, followed by pulsing for 30 min with sucrose at final concentrations ranging from 0 to 10 mM. Supernates of the bacterial cultures were collected and free fructose was measured. Results are the averages of three independent cultures, with error bars representing the standard deviations.

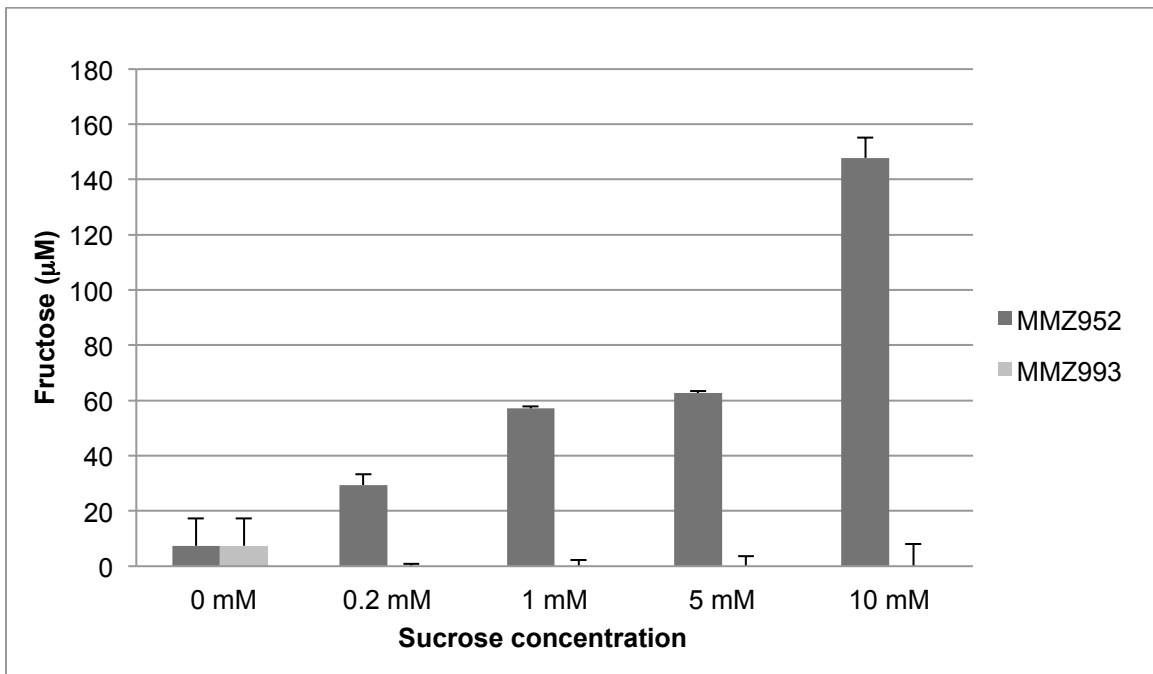



**FIG S2** Comparison of the cDNA levels in the region of *gtfBC:Tc* (A) and *gtfD* (B) in strain MMZ1009 growing in TY media supported solely by glucose, sucrose or fructose.

A

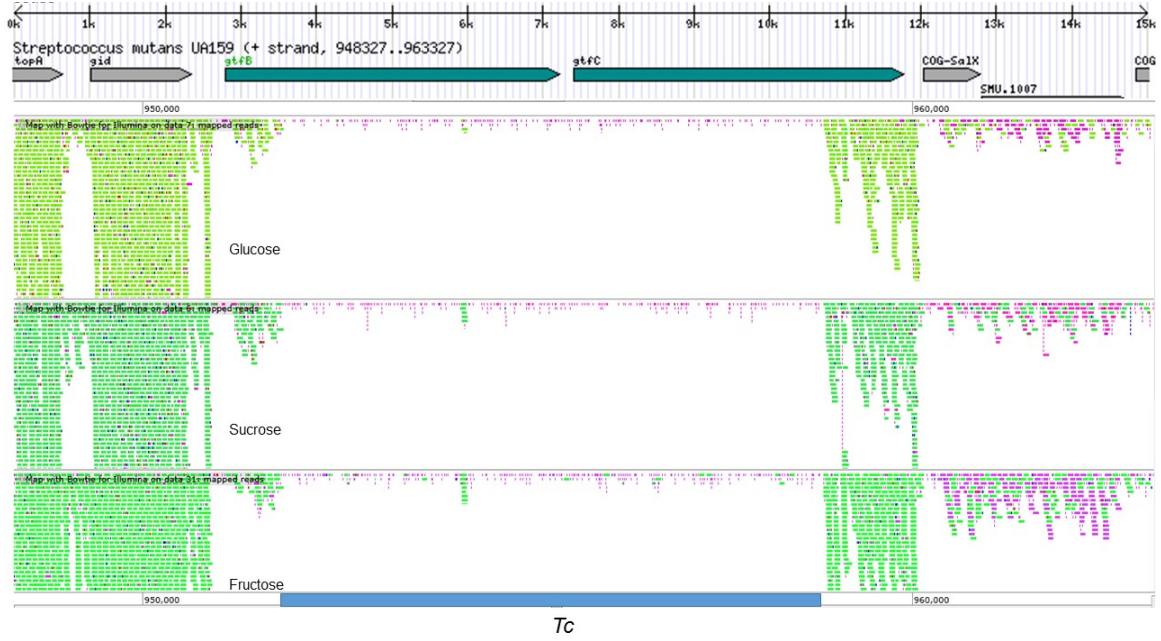

B

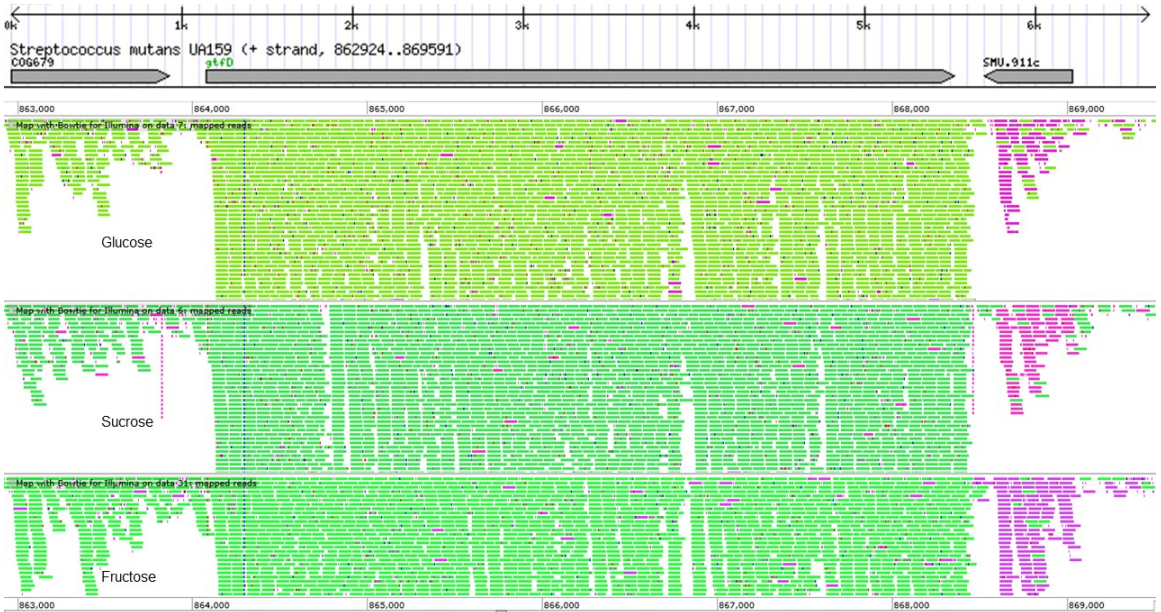

Supplement: AEM.02681-15_zam999116804so1.pdf [file AEM.02681-15_zam999116804so1.pdf]
